# Supplementary material for: EGFR amplification and outcome in a randomised phase III trial of chemotherapy alone or chemotherapy plus panitumumab for advanced gastro-oesophageal cancers
Source: Gut. 2020 Nov 16;70(9):1632–41. doi: 10.1136/gutjnl-2020-322658 (PMC8355876; doi:10.1136/gutjnl-2020-322658)
Supplement: Supplementary data [file gutjnl-2020-322658supp002.xlsx]

## Sheet: Supplementary Table 1
Supplementary Table 1. cfDNA concentration (ng/ul) based on clinical/radiological variables
Variable	Number of Subjects	Mean	SD	Min	Max
Locally advanced	48	0.736792	1.8821	0.106	12.1
Metastatic	306	1.3502	7.1172	0.1	120
Total	354	1.26702	6.65452	0.1	120
Two-sample Wilcoxon rank-sum (Mann-Whitney) test; p = 0.0808
O-G Junction	109	0.733321	1.51097	0.102	13.6
Oesophagus	138	1.8533	10.3541	0.1	120
Stomach	107	1.05456	2.40748	0.1	16.6
Total	354	1.26702	6.65452	0.1	120
Median test; p = 0.475
Female	58	2.91631	15.761	0.108	120
Male	296	0.943851	2.086	0.1	16.6
Total	354	1.26702	6.65452	0.1	120
Two-sample Wilcoxon rank-sum (Mann-Whitney) test; p = 0.6544
No Liver Metastases	187	1.41182	8.89414	0.1	120
Liver Metastases	119	1.25336	2.49435	0.1	15.7
Total	306	1.3502	7.1172	0.1	120
Two-sample Wilcoxon rank-sum (Mann-Whitney) test; p = 0.0007
No Lung Metastases	243	1.46283	7.92019	0.1	120
Lung Metastases	63	0.915746	2.02461	0.104	13.6
Total	306	1.3502	7.1172	0.1	120
Two-sample Wilcoxon rank-sum (Mann-Whitney) test; p = 0.8211
No Omental and/or Peritoneal Metastases	239	1.51038	8.00086	0.1	120
Omental and/or Peritoneal Metastases	67	0.778806	1.68046	0.1	13.1
Total	306	1.3502	7.1172	0.1	120
Two-sample Wilcoxon rank-sum (Mann-Whitney) test; p = 0.6149
Abbreviations: cfDNA= circulating cell-free DNA

## Sheet: Supplementary Table 2
Supplementary Table 2. Comparison FISH VS ddPCR Tissue (n=107)
		ddPCR
		Amplified	Non-Amplified	Total
FISH	Amplified	9	0	9
	Non-Amplified	2	96	98
	Total	11	96	107
	ddPCR VS FISH (gold standard)	Value	Confidence Interval
	Sensitivity	1	0.61-1
	Specificity	0.97	0.92-0.99
	Positive Predicitve Value	0.81	0.47-0.96
	Negative Predictive Value	0.95	0.95-1
Abbreviations: FISH= fluorescent in situ hybridization; ddPCR= digital-droplet PCR

## Sheet: Supplementary Table 3
Supplementary Table 3. Comparison ddPCR on tissues VS ddPCR on plasma cfDNA (n=170)
		ddPCR on tissue
		Amplified	Non-Amplified	Total
ddPCR on Plasma cfDNA	Amplified	7	3	10
	Non-Amplified	6	154	160
	Total	13	157	170
Abbreviations: ddPCR= digital-droplet PCR; cfDNA= circulating cell-free DNA

## Sheet: Supplementary Table 4
Supplementary Table 4. Comparison FISH, ddPCR on tissues VS ddPCR on plasma cfDNA (n=60)
		FISH and ddPCR on tissue
		Amplified	Non-Amplified	Total
ddPCR on Plasma cfDNA	Amplified	4	0	4
	Non-Amplified	3	53	56
	Total	7	53	60
Abbreviations: FISH= fluorescent in situ hybridization; ddPCR= digital-droplet PCR; cfDNA= circulating cell-free DNA

## Sheet: Supplementary Table 5
Supplementary Table 5. EGFR CNV in tissue and Progression Free Survival (PFS) in the ITT population
EGFR Status (copies)	number of subjects	Median	Str Error	95% CI
<2	233	6.41447	0.320116	5.98684	7.33553
≥2	17	4.57237	0.742105	2.5	10.5592
total	250	6.34868	0.266682	5.95395	7.03947
Cox regression by EGFR Status	HR	Str Error	p value	95% CI
	1.2977	0.337996	0.317	0.778882	2.1621
EGFR Status (copies)	number of subjects	Median	Str Error	95% CI
<5	238	6.41447	0.310445	6.01974	7.33553
≥5	12	3.81579	1.55549	1.61184	10.5592
total	250	6.34868	0.266682	5.95395	7.03947
Cox regression by EGFR Status	HR	Str Error	p value	95% CI
	1.69587	0.527818	0.09	0.92144	3.12118
Abbreviations: EGFR= epidermal growth factor receptor; CNV=copy number variation; ITT=intention to treat; HR=hazard ration; CI= confidence interval

## Sheet: Supplementary Table 6
Supplementary Table 6: Progression Free Survival (PFS) by treatment arm and EGFR status in tumour tissues
EOX arm
EGFR	Sample size	Median PFS (95% C.I.)	HR (95% CI)
<2	120	7.63 (6.41-8.85)	Ref
≥2	7	6.64 (na)	1.39 (0.61-3.17)
<5	122	7.63 (6.41-8.85)	Ref
≥5	5	4.57 (na)	2.19 (0.80-6.01)
EOX-P arm
EGFR	Sample size	Median PFS (95% C.I.)	HR (95% CI)
<2	113	5.72 (4.51-6.28)	Ref
≥2	10	2.73 (1.61-12.20)	1.22 (0.64-2.34)
<5	116	5.72 (4.38-6.22)	Ref cat
≥5	7	2.63 (1.61-12.20)	1.45 xx
Abbreviations: EGFR= epidermal growth factor receptor; EOX=epirubicin + oxaliplatin + capecitabine; P= panitumumab; HR=hazard ration; CI= confidence interval

## Sheet: Supplementary Table 7
Supplementary Table 7. EGFR CNV in tissue and Overall Survival (OS) in the ITT population
EGFR Status (copies)	number of subjects	Median	Str Error	95% CI
<2	233	11.1842	0.60377	8.78289	13.1579
≥2	17	9.73684	3.05848	3.68421	11.3487
total	250	9.83553	0.634071	8.78289	11.3487
Cox regression by EGFR Status	HR	Str Error	p value	95% CI
	1.27687	0.333677	0.35	0.765081	2.13101
EGFR Status (copies)	number of subjects	Median	Str Error	95% CI
<5	238	9.83553	0.68321	8.84868	11.4803
≥5	12	8.09211	3.96498	2.99342	12.9276
total	250	9.83553	0.634071	8.78289	11.3487
Cox regression by EGFR Status	HR	Str Error	p value	95% CI
	1.51515	0.470973	0.181	0.82388	2.78641
Abbreviations: EGFR= epidermal growth factor receptor; CNV=copy number variation; ITT=intention to treat; HR=hazard ration; CI= confidence interval

## Sheet: Supplementary Table 8
Supplementary Table 8: Overall Survival (OS) by treatment arm and EGFR status in tumour tissues
EOX arm
EGFR	Sample size	Median OS (95% C.I.)	Hazard ratio (95% CI)
<2	120	12.53 (9.47-15.69)	Ref cat
≥2	7	11.45 (na)	1.19 (0.52-2.75)
<5	122	12.83 (9.93-15.69)	Ref
≥5	5	10.53 (na)	1.26 (0.46-3.44)
EOX-P arm
EGFR	Sample size	Median OS (95% C.I.)	Hazard ratio (95% CI)
<2	113	8.52 (7.04-9.70)	Ref cat
≥2	10	5.69 (1.68-12.93)	1.26 (0.66-2.42)
<5	116	8.52 (7.04-9.74)	Ref cat
≥5	7	5.69 (1.68-12.93)	1.57 (0.72-3.38)
Abbreviations: EGFR= epidermal growth factor receptor; EOX=epirubicin + oxaliplatin + capecitabine; P= panitumumab; HR=hazard ration; CI= confidence interval

## Sheet: Supplementary Table 9
Supplementary Table 9. EGFR CNV in plasma cfDNA and Progression Free Survival (PFS) in the ITT population
EGFR Status (copies)	number of subjects	Median	Str Error	95% C.I.
<2	332	6.97368	0.485003	6.28289	8.15789
≥2	22	5.65789	1.87951	2.63158	10
total	354	6.84211	0.423528	6.28289	7.89474
Cox regression by EGFR Status	HR	Str Error	p value	95% C.I.
	1.28984	0.29205	0.261	0.827564	2.01033
Abbreviations: EGFR= epidermal growth factor receptor; CNV=copy number variation; cfDNA= circlating cell-free DNA; ITT=intention to treat; HR=hazard ration; CI= confidence interval

## Sheet: Supplementary Table 10
Supplementary Table 10. EGFR CNV in plasma cfDNA and Overall Survival (OS) in the ITT population
EGFR Status (copies)	number of subjects	Median	Str Error	95% C.I.
<2	332	10.9868	0.629567	9.70395	12.1382
≥2	22	8.09211	2.24736	3.88158	12.9276
total	354	10.8553	0.672506	9.375	11.9737
Cox regression by EGFR Status	HR	Str Error	p value	95% C.I.
	1.68709	0.485127	0.069	0.960226	2.96417
Abbreviations: EGFR= epidermal growth factor receptor; CNV=copy number variation; cfDNA= circlating cell-free DNA; ITT=intention to treat; HR=hazard ration; CI= confidence interval

[truncated: 7 more sheets: Supplementary Table 11, Supplementary Table 12, Supplementary Table 13, Supplementary Table 14, Supplementary Table 15, Supplementary Table 16, Supplementary Table 17]
